# Supplementary material for: Phase transition studies of dutasteride crystalline forms
Source: Royal Society of Chemistry journal article supplement (doi:10.1039/c5ce00036j), 2015-01-01
Supplement: c5ce00036j1.pdf [file c5ce00036j1.pdf]

Appendix A

# Supporting Information

Phase transition studies of dutasteride crystalline forms

Marta Łaszcz\*, Kinga Trzcińska, Anna Witkowska, Elżbieta Lipiec-Abramska,  
Wojciech J. Szczepek

Pharmaceutical Research Institute (PRI), Warszawa 01-793, Poland

\*Author to whom all correspondence should be addressed: e-mail: m.laszcz@ifarm.eu;

Tel.: +48-22-4563-903; Fax: +48-22-4563-838

## Table of Contents

| Figure/Table | Title                                                                                                                                                                                               | Page |
|--------------|-----------------------------------------------------------------------------------------------------------------------------------------------------------------------------------------------------|------|
| Figure A1    | The structural formula of dutasteride.                                                                                                                                                              | 2    |
| Figure A2    | The comparison of diffractograms of dutasteride forms: I, II, 1 and 2.                                                                                                                              | 2    |
| Figure A3    | The comparison of the simulated powder diffractogram of hemihydrate dutasteride (LATSİK) with the form III.                                                                                         | 3    |
| Figure A4    | The comparison of the IR spectra of the reference forms: I, II and III with the studied sample of dutasteride.                                                                                      | 4    |
| Table A1     | IR phase analysis of the dutasteride sample.                                                                                                                                                        | 4    |
| Figure A5    | The comparison of diffractograms of the reference forms: I, II and III with the studied sample of dutasteride.                                                                                      | 5    |
| Table A2     | PXRD phase analysis of the dutasteride sample.                                                                                                                                                      | 5    |
| Table A3     | Bond lengths for the dutasteride form I molecule.                                                                                                                                                   | 6    |
| Table A4     | Bond angles for the dutasteride form I molecule.                                                                                                                                                    | 6    |
| Table A5     | Torsion angles for the dutasteride form I molecule.                                                                                                                                                 | 7    |
| Figure A6    | The comparison of the simulated powder diffractogram of form I dutasteride with the experimental diffractogram of the reference sample and the diffractogram of form I from the patent publication. | 10   |

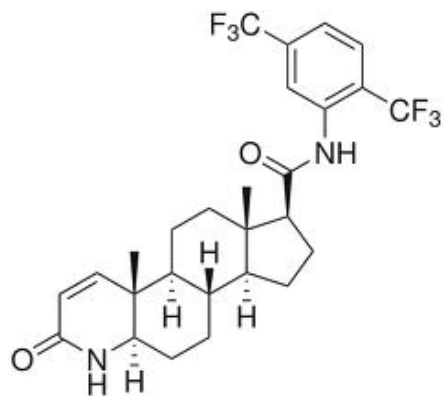

Fig. A1

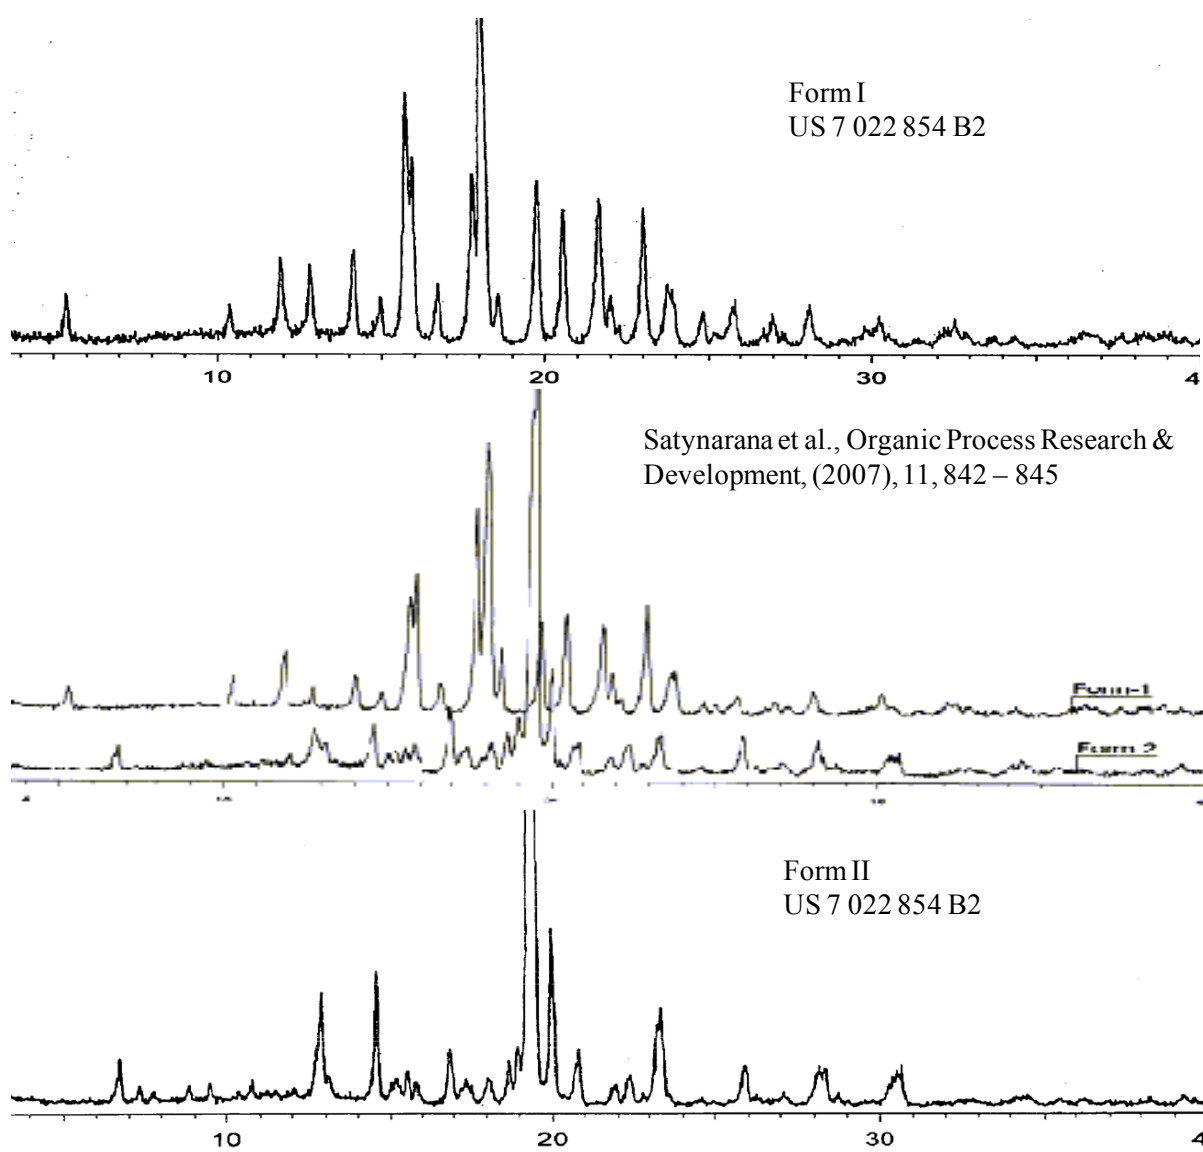

Fig. A2

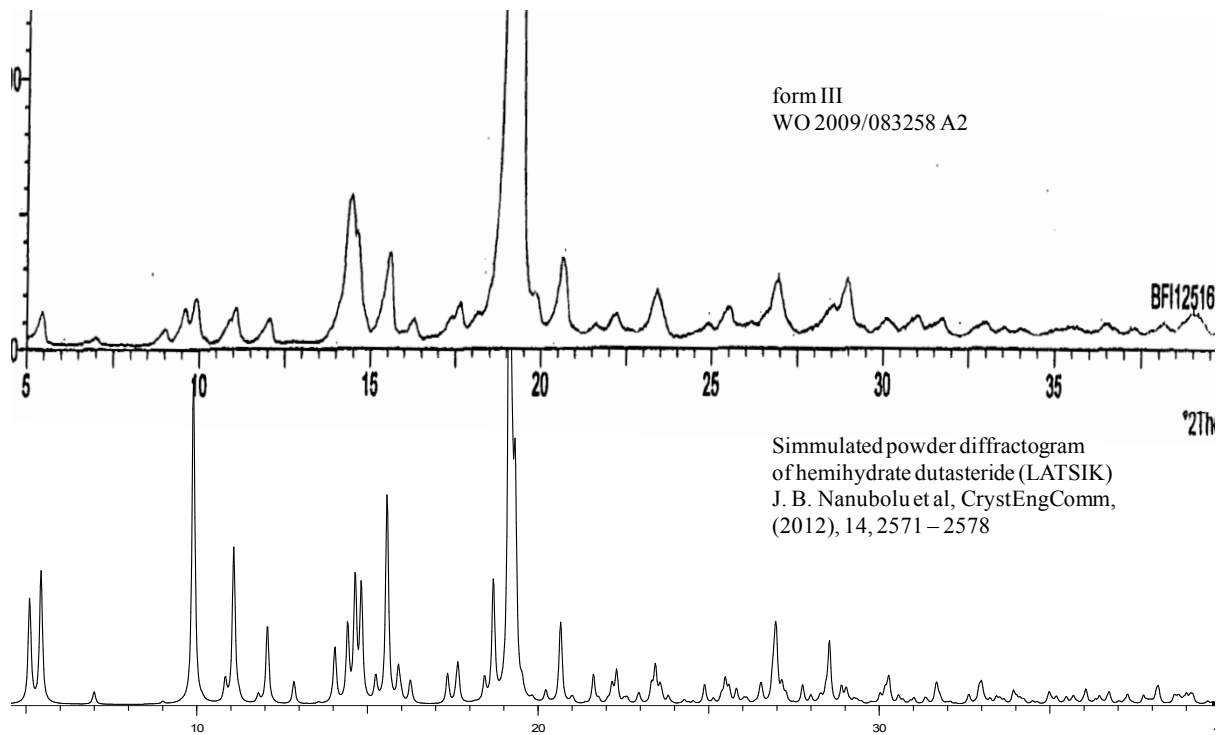

Fig. A3

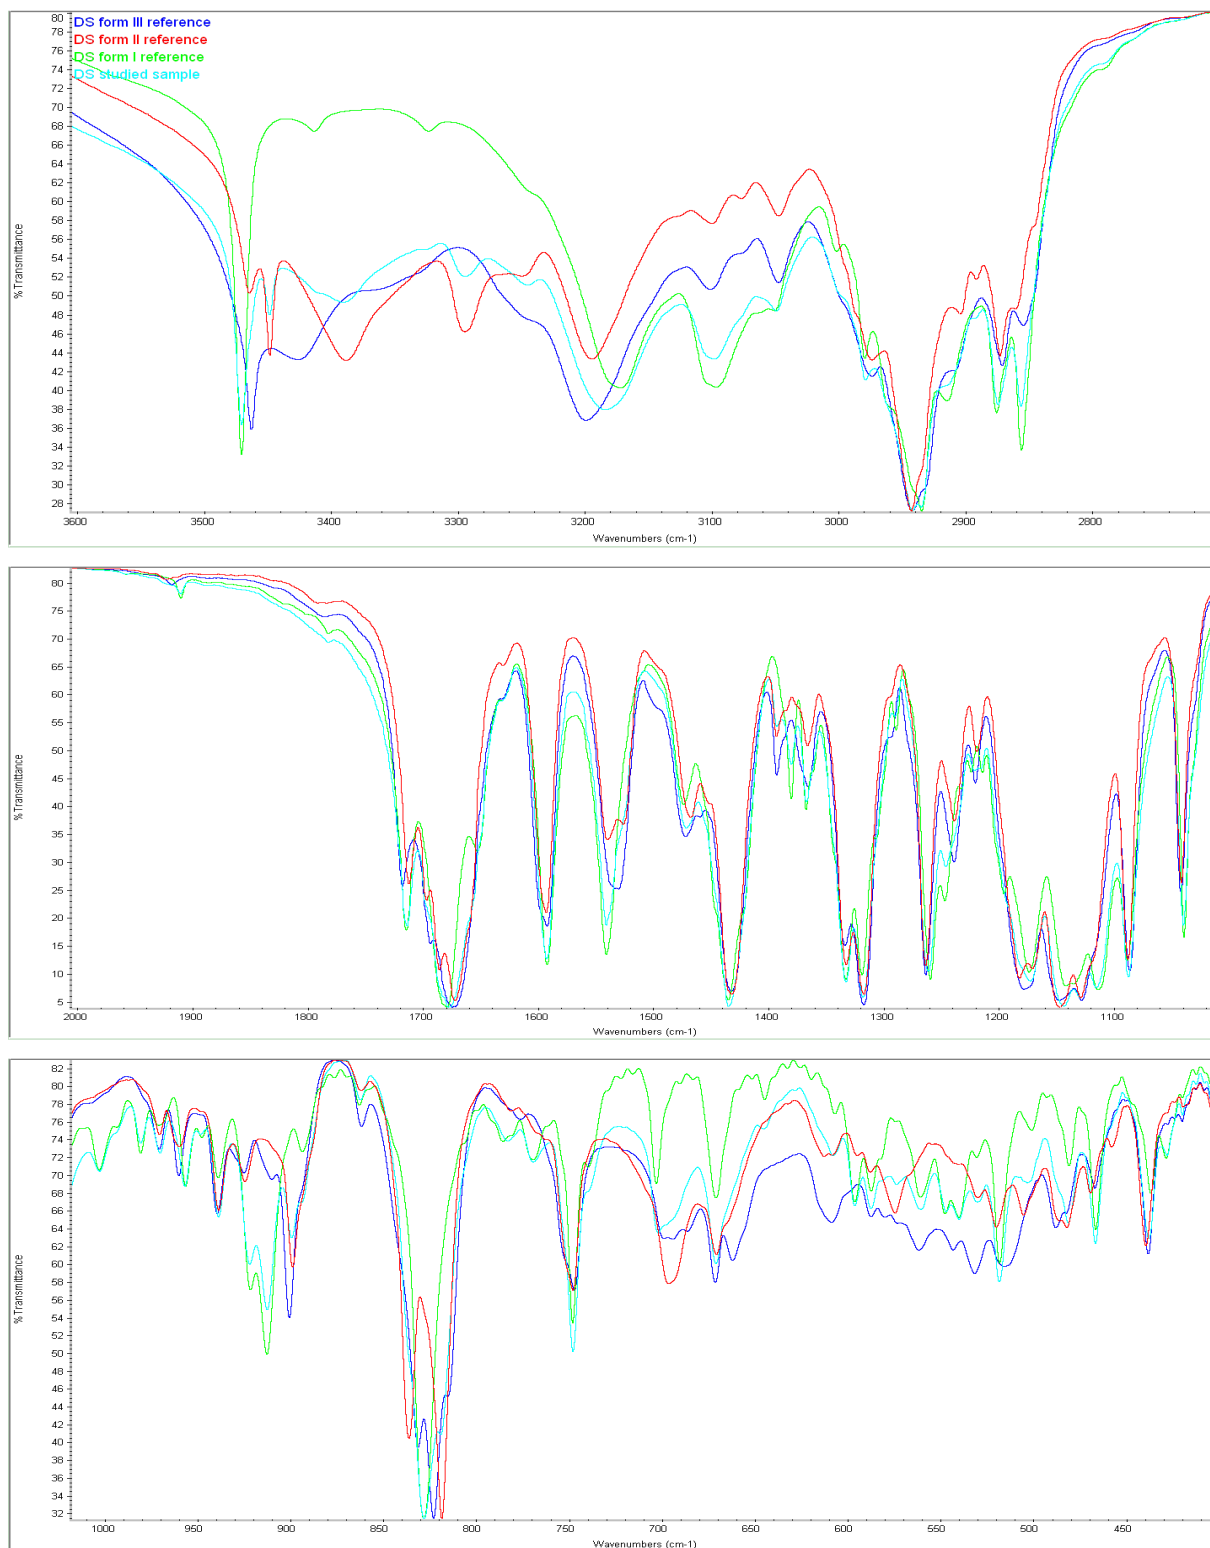

Fig. A4

Table A1. IR phase analysis of the dutasteride sample.

| Main form | Additional forms                                                             |
|-----------|------------------------------------------------------------------------------|
| form I    | form II: 3448, 3390, 3294, 3245, 2941, 1392, 899, 819, 573cm <sup>-1</sup> . |

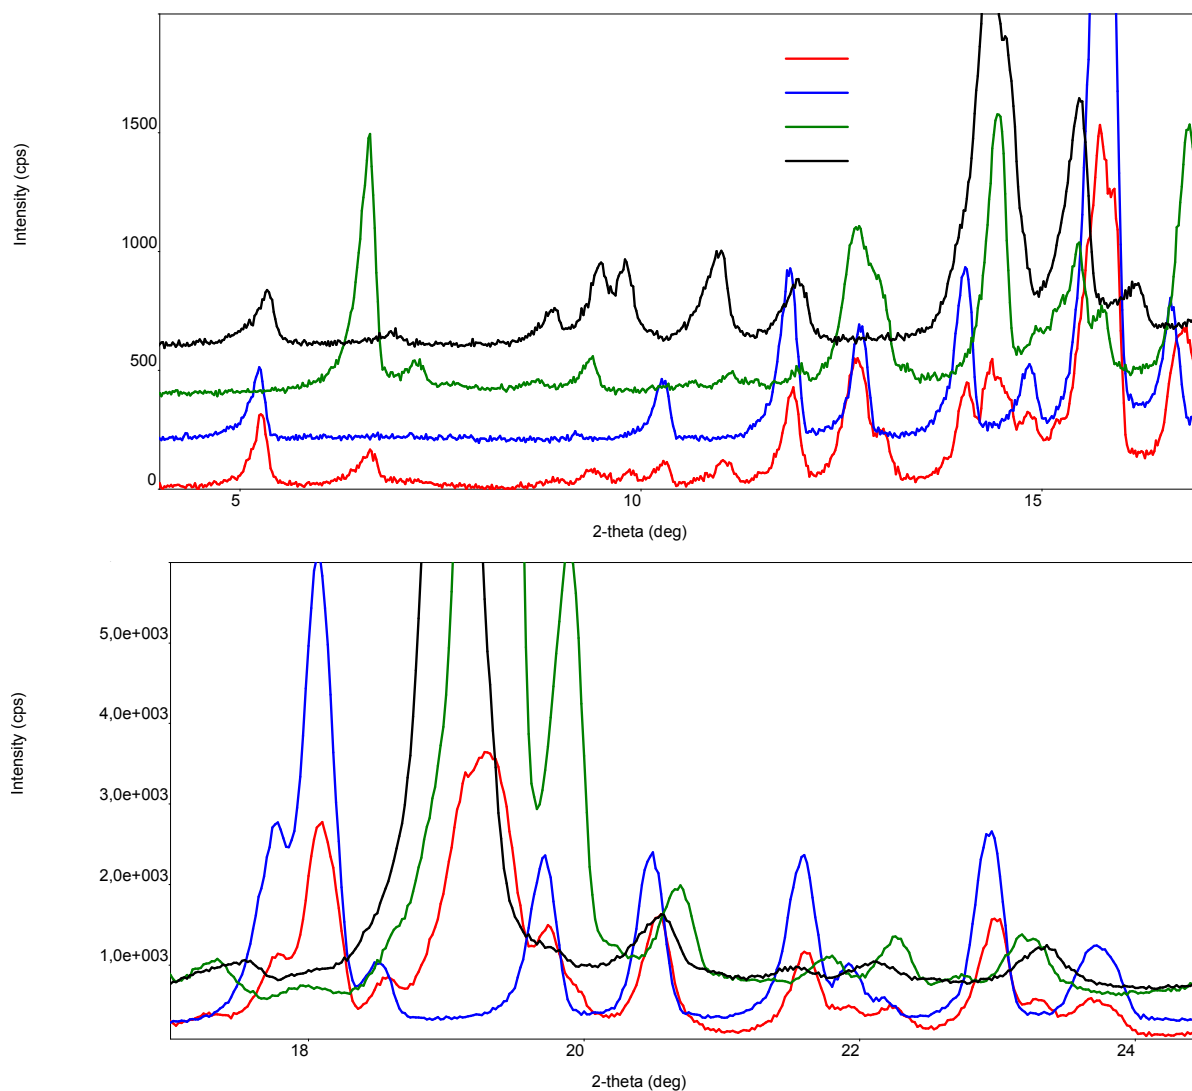

Fig. A5

Table A2. PXRD phase analysis of the dutasteride sample.

| Main form | Additional forms                                                                                                        |
|-----------|-------------------------------------------------------------------------------------------------------------------------|
| form I    | form II: 6.63, 9.36, 11.02, 13.02, 14.37, 15.21, 16.78, 17.26, 19.30, 19.92, 22.24, 23.31, 28.82 °.<br>form III: 9.84°. |

Table A3. Bond lengths for the dutasteride form I molecule.

| Atom | Atom | Length/Å  | Atom | Atom | Length/Å  |
|------|------|-----------|------|------|-----------|
| F1   | C26  | 1.340(3)  | C7   | C8   | 1.528(2)  |
| F2   | C26  | 1.357(2)  | C8   | C9   | 1.554(2)  |
| F3   | C26  | 1.327(2)  | C8   | C13  | 1.527(2)  |
| F4   | C27  | 1.301(13) | C9   | C10  | 1.539(3)  |
| F4A  | C27A | 1.335(6)  | C10  | C11  | 1.549(2)  |
| F5   | C27  | 1.301(14) | C11  | C12  | 1.531(3)  |
| F5A  | C27A | 1.332(5)  | C12  | C13  | 1.544(3)  |
| F6   | C27  | 1.307(13) | C12  | C16  | 1.554(2)  |
| F6A  | C27A | 1.321(5)  | C12  | C17  | 1.541(3)  |
| O1   | C1   | 1.241(2)  | C13  | C14  | 1.528(2)  |
| O2   | C19  | 1.215(3)  | C14  | C15  | 1.557(3)  |
| N1   | C1   | 1.334(2)  | C15  | C16  | 1.558(3)  |
| N1   | C5   | 1.459(2)  | C16  | C19  | 1.519(3)  |
| N2   | C19  | 1.385(2)  | C20  | C21  | 1.405(3)  |
| N2   | C20  | 1.410(2)  | C20  | C25  | 1.393(3)  |
| C1   | C2   | 1.486(3)  | C21  | C22  | 1.395(3)  |
| C2   | C3   | 1.333(3)  | C21  | C26  | 1.502(3)  |
| C3   | C4   | 1.517(2)  | C22  | C23  | 1.381(3)  |
| C4   | C5   | 1.539(3)  | C23  | C24  | 1.380(3)  |
| C4   | C9   | 1.558(2)  | C24  | C25  | 1.388(3)  |
| C4   | C18  | 1.541(3)  | C24  | C27  | 1.486(14) |
| C5   | C6   | 1.516(2)  | C24  | C27A | 1.515(4)  |
| C6   | C7   | 1.528(2)  |      |      |           |

Table A4. Bond angles for the dutasteride form I molecule.

| Atom | Atom | Atom | Angle/°    | Atom | Atom | Atom | Angle/°    |
|------|------|------|------------|------|------|------|------------|
| C1   | N1   | C5   | 121.67(16) | C19  | C16  | C12  | 114.07(16) |
| C19  | N2   | C20  | 127.89(17) | C19  | C16  | C15  | 117.42(16) |
| O1   | C1   | N1   | 122.18(18) | O2   | C19  | N2   | 122.73(18) |
| O1   | C1   | C2   | 122.03(18) | O2   | C19  | C16  | 122.23(18) |
| N1   | C1   | C2   | 115.76(16) | N2   | C19  | C16  | 114.97(17) |
| C3   | C2   | C1   | 121.03(17) | C21  | C20  | N2   | 119.18(17) |
| C2   | C3   | C4   | 121.59(17) | C25  | C20  | N2   | 121.90(17) |
| C3   | C4   | C5   | 105.54(15) | C25  | C20  | C21  | 118.91(17) |
| C3   | C4   | C9   | 114.13(15) | C20  | C21  | C26  | 121.29(17) |
| C3   | C4   | C18  | 106.02(15) | C22  | C21  | C20  | 120.42(18) |
| C5   | C4   | C9   | 107.42(14) | C22  | C21  | C26  | 118.28(18) |
| C5   | C4   | C18  | 112.23(15) | C23  | C22  | C21  | 120.2(2)   |
| C18  | C4   | C9   | 111.44(15) | C24  | C23  | C22  | 119.20(19) |
| N1   | C5   | C4   | 110.67(15) | C23  | C24  | C25  | 121.8(2)   |
| N1   | C5   | C6   | 110.50(15) | C23  | C24  | C27  | 122.2(7)   |

|     |     |     |            |     |      |      |            |
|-----|-----|-----|------------|-----|------|------|------------|
| C6  | C5  | C4  | 113.99(15) | C23 | C24  | C27A | 117.3(2)   |
| C5  | C6  | C7  | 108.83(14) | C25 | C24  | C27  | 114.7(6)   |
| C8  | C7  | C6  | 112.20(15) | C25 | C24  | C27A | 120.8(2)   |
| C7  | C8  | C9  | 111.11(15) | C27 | C24  | C27A | 15.4(6)    |
| C13 | C8  | C7  | 111.38(15) | C24 | C25  | C20  | 119.46(18) |
| C13 | C8  | C9  | 108.66(14) | F1  | C26  | F2   | 105.32(17) |
| C8  | C9  | C4  | 110.55(14) | F1  | C26  | C21  | 112.56(17) |
| C10 | C9  | C4  | 113.96(15) | F2  | C26  | C21  | 111.54(16) |
| C10 | C9  | C8  | 111.63(14) | F3  | C26  | F1   | 106.96(16) |
| C9  | C10 | C11 | 113.07(16) | F3  | C26  | F2   | 106.16(17) |
| C12 | C11 | C10 | 110.36(15) | F3  | C26  | C21  | 113.73(17) |
| C11 | C12 | C13 | 107.80(15) | F4  | C27  | F6   | 109.0(14)  |
| C11 | C12 | C16 | 116.25(16) | F4  | C27  | C24  | 121.2(11)  |
| C11 | C12 | C17 | 111.21(16) | F5  | C27  | F4   | 101.6(13)  |
| C13 | C12 | C16 | 99.06(14)  | F5  | C27  | F6   | 97.8(14)   |
| C17 | C12 | C13 | 113.10(16) | F5  | C27  | C24  | 113.9(13)  |
| C17 | C12 | C16 | 108.96(15) | F6  | C27  | C24  | 110.6(11)  |
| C8  | C13 | C12 | 113.02(15) | F4A | C27A | C24  | 112.7(3)   |
| C8  | C13 | C14 | 118.25(15) | F5A | C27A | F4A  | 106.1(3)   |
| C14 | C13 | C12 | 104.76(15) | F5A | C27A | C24  | 109.4(4)   |
| C13 | C14 | C15 | 104.06(15) | F6A | C27A | F4A  | 105.8(4)   |
| C14 | C15 | C16 | 105.51(15) | F6A | C27A | F5A  | 109.5(4)   |
| C12 | C16 | C15 | 105.09(15) | F6A | C27A | C24  | 113.0(3)   |

Table A5. Torsion angles for the dutasteride form I molecule.

| <b>A</b> | <b>B</b> | <b>C</b> | <b>D</b> | <b>Angle/°</b> | <b>A</b> | <b>B</b> | <b>C</b> | <b>D</b> | <b>Angle/°</b> |
|----------|----------|----------|----------|----------------|----------|----------|----------|----------|----------------|
| O1       | C1       | C2       | C3       | 163.0(2)       | C15      | C16      | C19      | O2       | -164.9(2)      |
| N1       | C1       | C2       | C3       | -15.0(3)       | C15      | C16      | C19      | N2       | 18.0(3)        |
| N1       | C5       | C6       | C7       | 176.14(15)     | C16      | C12      | C13      | C8       | 176.39(15)     |
| N2       | C20      | C21      | C22      | 179.15(18)     | C16      | C12      | C13      | C14      | 46.31(18)      |
| N2       | C20      | C21      | C26      | 0.0(3)         | C17      | C12      | C13      | C8       | 61.2(2)        |
| N2       | C20      | C25      | C24      | -179.14(18)    | C17      | C12      | C13      | C14      | -68.88(19)     |
| C1       | N1       | C5       | C4       | 45.4(2)        | C17      | C12      | C16      | C15      | 78.63(18)      |
| C1       | N1       | C5       | C6       | 172.64(18)     | C17      | C12      | C16      | C19      | -51.4(2)       |
| C1       | C2       | C3       | C4       | 0.0(3)         | C18      | C4       | C5       | N1       | 61.7(2)        |
| C2       | C3       | C4       | C5       | 33.7(2)        | C18      | C4       | C5       | C6       | -63.6(2)       |
| C2       | C3       | C4       | C9       | 151.47(19)     | C18      | C4       | C9       | C8       | 67.02(19)      |
| C2       | C3       | C4       | C18      | -85.5(2)       | C18      | C4       | C9       | C10      | -59.7(2)       |
| C3       | C4       | C5       | N1       | -53.34(19)     | C19      | N2       | C20      | C21      | -169.74(18)    |
| C3       | C4       | C5       | C6       | -178.63(15)    | C19      | N2       | C20      | C25      | 10.0(3)        |
| C3       | C4       | C9       | C8       | -172.93(15)    | C20      | N2       | C19      | O2       | -7.0(3)        |
| C3       | C4       | C9       | C10      | 60.4(2)        | C20      | N2       | C19      | C16      | 170.10(17)     |
| C4       | C5       | C6       | C7       | -58.5(2)       | C20      | C21      | C22      | C23      | 0.0(3)         |

|     |     |     |     |             |      |     |      |      |             |
|-----|-----|-----|-----|-------------|------|-----|------|------|-------------|
| C4  | C9  | C10 | C11 | 178.53(16)  | C20  | C21 | C26  | F1   | -57.8(2)    |
| C5  | N1  | C1  | O1  | 172.6(2)    | C20  | C21 | C26  | F2   | 60.3(3)     |
| C5  | N1  | C1  | C2  | -9.5(3)     | C20  | C21 | C26  | F3   | -179.68(17) |
| C5  | C4  | C9  | C8  | -56.29(19)  | C21  | C20 | C25  | C24  | 0.6(3)      |
| C5  | C4  | C9  | C10 | 177.03(15)  | C21  | C22 | C23  | C24  | 0.7(3)      |
| C5  | C6  | C7  | C8  | 55.3(2)     | C22  | C21 | C26  | F1   | 122.9(2)    |
| C6  | C7  | C8  | C9  | -55.8(2)    | C22  | C21 | C26  | F2   | -118.9(2)   |
| C6  | C7  | C8  | C13 | -177.09(16) | C22  | C21 | C26  | F3   | 1.1(3)      |
| C7  | C8  | C9  | C4  | 56.4(2)     | C22  | C23 | C24  | C25  | -0.7(3)     |
| C7  | C8  | C9  | C10 | -175.62(15) | C22  | C23 | C24  | C27  | 165.5(6)    |
| C7  | C8  | C13 | C12 | -178.09(16) | C22  | C23 | C24  | C27A | -177.7(3)   |
| C7  | C8  | C13 | C14 | -55.2(2)    | C23  | C24 | C25  | C20  | 0.0(3)      |
| C8  | C9  | C10 | C11 | 52.4(2)     | C23  | C24 | C27  | F4   | -115.3(13)  |
| C8  | C13 | C14 | C15 | -161.98(16) | C23  | C24 | C27  | F5   | 6.4(15)     |
| C9  | C4  | C5  | N1  | -175.49(14) | C23  | C24 | C27  | F6   | 115.3(13)   |
| C9  | C4  | C5  | C6  | 59.22(19)   | C23  | C24 | C27A | F4A  | 56.7(4)     |
| C9  | C8  | C13 | C12 | 59.2(2)     | C23  | C24 | C27A | F5A  | -61.1(5)    |
| C9  | C8  | C13 | C14 | -177.94(16) | C23  | C24 | C27A | F6A  | 176.7(3)    |
| C9  | C10 | C11 | C12 | -55.2(2)    | C25  | C20 | C21  | C22  | -0.6(3)     |
| C10 | C11 | C12 | C13 | 57.6(2)     | C25  | C20 | C21  | C26  | -179.84(18) |
| C10 | C11 | C12 | C16 | 167.63(16)  | C25  | C24 | C27  | F4   | 51.9(15)    |
| C10 | C11 | C12 | C17 | -66.9(2)    | C25  | C24 | C27  | F5   | 173.5(11)   |
| C11 | C12 | C13 | C8  | -62.2(2)    | C25  | C24 | C27  | F6   | -77.5(13)   |
| C11 | C12 | C13 | C14 | 167.75(16)  | C25  | C24 | C27A | F4A  | -120.3(3)   |
| C11 | C12 | C16 | C15 | -154.79(16) | C25  | C24 | C27A | F5A  | 122.0(3)    |
| C11 | C12 | C16 | C19 | 75.2(2)     | C25  | C24 | C27A | F6A  | -0.3(5)     |
| C12 | C13 | C14 | C15 | -35.06(19)  | C26  | C21 | C22  | C23  | 179.2(2)    |
| C12 | C16 | C19 | O2  | -41.3(3)    | C27  | C24 | C25  | C20  | -167.2(6)   |
| C12 | C16 | C19 | N2  | 141.57(17)  | C27  | C24 | C27A | F4A  | 169(3)      |
| C13 | C8  | C9  | C4  | 179.29(15)  | C27  | C24 | C27A | F5A  | 52(3)       |
| C13 | C8  | C9  | C10 | -52.7(2)    | C27  | C24 | C27A | F6A  | -71(3)      |
| C13 | C12 | C16 | C15 | -39.72(18)  | C27A | C24 | C25  | C20  | 176.9(3)    |
| C13 | C12 | C16 | C19 | -169.72(16) | C27A | C24 | C27  | F4   | 169(4)      |
| C13 | C14 | C15 | C16 | 9.2(2)      | C27A | C24 | C27  | F5   | -69(3)      |
| C14 | C15 | C16 | C12 | 19.5(2)     | C27A | C24 | C27  | F6   | 40(2)       |
| C14 | C15 | C16 | C19 | 147.51(17)  |      |     |      |      |             |

Single X-ray crystal data of the dutasteride form I were deposited at The Cambridge Crystallographic Data Centre. The deposition number CCDC 1032001 contains supplementary crystallographic data. These data can be obtained free of charge *via* [www.ccdc.cam.ac.uk/conts/retrieving.html](http://www.ccdc.cam.ac.uk/conts/retrieving.html) (or from the CCDC, 12 Union Road, Cambridge CB2 1EZ, UK; fax: +44-1223-336033; e-mail: [deposit@ccdc.cam.ac.uk](mailto:deposit@ccdc.cam.ac.uk)).





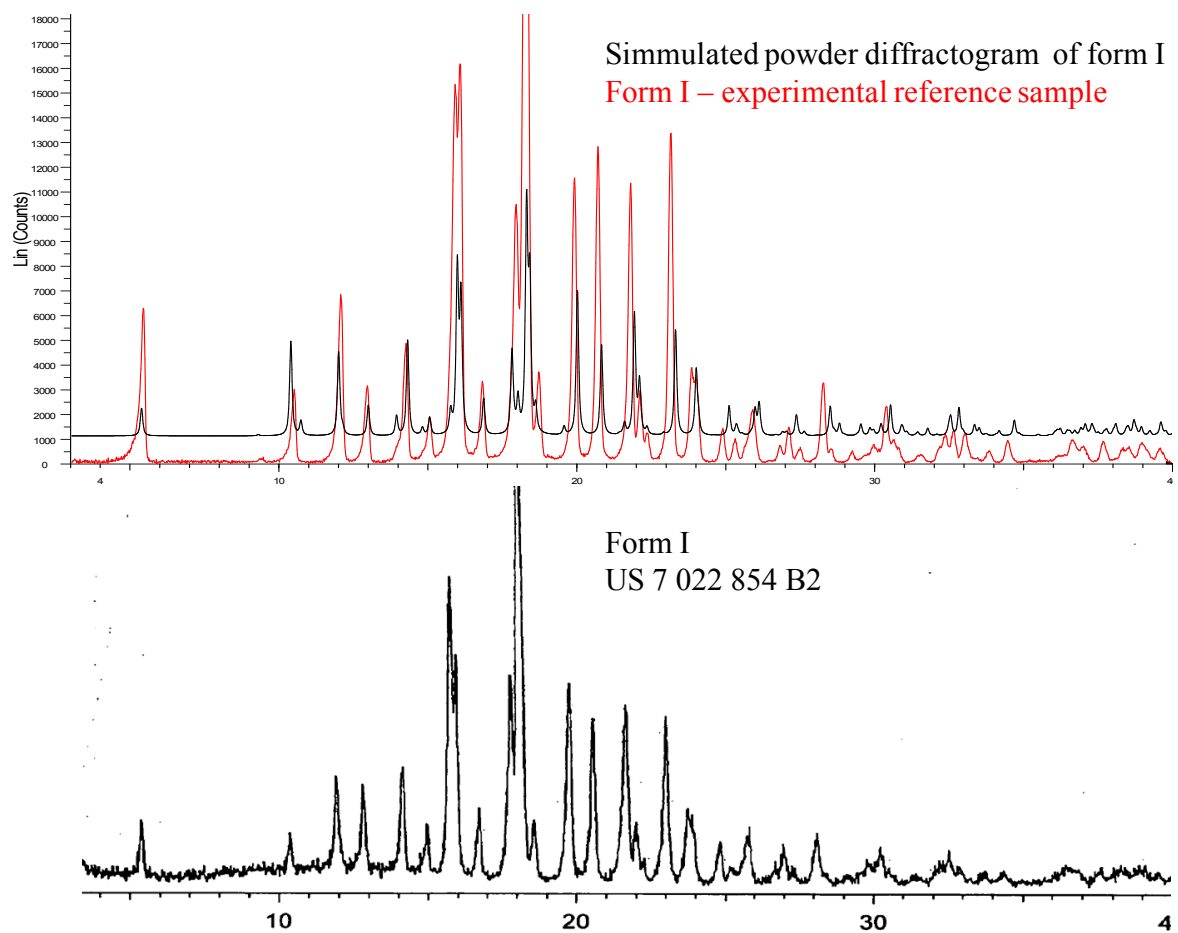

Fig. A6
